# Supplementary material for: Insulin sensitivity depends on the route of glucose administration
Source: Springer Nature journal article supplement (doi:10.1007/s00125-020-05157-w), 2020-05-08
Supplement: MOESM1 [file 17964850]

|                                                           |       | NGT<br>(n=9) |         | IGT (n=7) |         | T2DM<br>(n=7) |         | Total<br>(n=23) |         | *P   |
|-----------------------------------------------------------|-------|--------------|---------|-----------|---------|---------------|---------|-----------------|---------|------|
|                                                           |       | Mean         | SD      | Mean      | SD      | Mean          | SD      | Mean            | SD      |      |
| RoD [ $\mu\text{mol}/(\text{min kg})$ ]                   | OGTT  | 15.7         | 2.2     | 16.0      | 2.9     | 13.9          | 3.8     | 15.2            | 3.0     | 0.37 |
|                                                           | IGIVI | 14.5         | 4.1     | 13.4      | 2.4     | 14.8          | 5.3     | 14.3            | 4.0     | 0.81 |
| EGP $\times$ I [ $\mu\text{mol}/(\text{min kg})$<br>pM]   | OGTT  | 968.2        | 1668.8  | 771.8     | 616.5   | 891.6         | 745.9   | 885.1           | 1129.1  | 0.95 |
|                                                           | IGIVI | 883.9        | 812.2   | 519.8     | 235.3   | 1111.9        | 1163.7  | 842.5           | 825.4   | 0.42 |
| MCR/I [ $\text{l min}^{-1} \text{kg}^{-1}$ per<br>nmol/l] | OGTT  | 8.4          | 2.6     | 7.7       | 2.2     | 5.4           | 2.1     | 7.3             | 2.6     | 0.06 |
|                                                           | IGIVI | 14           | 5.2     | 11.3      | 5.8     | 10.3          | 4.2     | 12              | 5.1     | 0.33 |
| Insulin Clearance [ $\text{l}/\text{min}$ ]               | OGTT  | 2.2          | 0.6     | 1.9       | 0.2     | 2.4           | 0.5     | 2.2             | 0.5     | 0.12 |
|                                                           | IGIVI | 2.5          | 0.9     | 2.1       | 0.4     | 3.0           | 0.8     | 2.6             | 0.8     | 0.10 |
| DI                                                        | OGTT  | 4800         | 1700    | 4000      | 800     | 3900          | 1700    | 4300            | 1500    | 0.44 |
|                                                           | IGIVI | 5200         | 2000    | 4200      | 1800    | 5600          | 2200    | 5000            | 2000    | 0.40 |
| Total ISR [ $\text{pmol}/\text{min}$ ]                    | OGTT  | 220369.3     | 48889.4 | 219044.6  | 79632.3 | 278896.3      | 71258.2 | 237778.7        | 68971.3 | 0.17 |
|                                                           | IGIVI | 151710.3     | 53320.8 | 153822.1  | 55589.5 | 205185.7      | 45032.5 | 168628.2        | 55152.3 | 0.11 |
| $\Phi_S$ [ $10^9 \text{min}^{-1}$ ]                       | OGTT  | 26.5         | 17.3    | 35.9      | 20.3    | 33.0          | 19.4    | 31.3            | 18.5    | 0.60 |
|                                                           | IGIVI | 38.0         | 20.2    | 25.2      | 22.5    | 16.6          | 18.3    | 27.6            | 21.5    | 0.13 |
| $\Phi_D$ [ $10^{-9}$ ]                                    | OGTT  | 532.8        | 303.3   | 654.6     | 245.2   | 650.8         | 296.0   | 605.8           | 278.1   | 0.62 |
|                                                           | IGIVI | 425.2        | 157.4   | 430.5     | 312.0   | 253.3         | 194.6   | 374.5           | 229.4   | 0.26 |
| $\Phi_{\text{global}}$ [ $10^9 \text{min}^{-1}$ ]         | OGTT  | 29.9         | 18.3    | 40.2      | 20.7    | 37.7          | 19.3    | 35.4            | 19.0    | 0.55 |
|                                                           | IGIVI | 40.9         | 20.6    | 28.0      | 24.0    | 18.5          | 19.0    | 30.2            | 22.4    | 0.13 |

\* P values from ANOVA

**ESM Table 1 : RoD= rate of glucose disappearance; EGP=endogenous glucose production; MCR=metabolic clearance rate; DI=disposition index; ISR=insulin secretion rate,  $\Phi_S$  =static beta cell sensitivity;  $\Phi_D$  =dynamic beta cell sensitivity;  $\Phi_{\text{global}}$  =global beta cell sensitivity**

| Metabolite                   | time2 | P-value  | time3 | P-value  | IGIVI | P-value | IGT    | P-value | T2DM  | P-value | time2:IGIVI | P-value | time3:IGIVI | P-value |
|------------------------------|-------|----------|-------|----------|-------|---------|--------|---------|-------|---------|-------------|---------|-------------|---------|
| X3.Hydroxybutyric.acid       | -1.25 | 1.55E-18 | -1.79 | 8.28E-29 | -0.46 | 0.000   | -0.049 | 0.798   | 0.454 | 0.027   | 0.325       | 0.053   | 0.642       | 0.000   |
| Alanine                      | 0.00  | 9.69E-01 | -0.03 | 4.98E-01 | 0.20  | 0.000   | 0.199  | 0.040   | 0.193 | 0.046   | -0.101      | 0.166   | -0.138      | 0.060   |
| Isoleucine                   | -0.46 | 2.10E-10 | -0.71 | 3.38E-19 | -0.04 | 0.590   | -0.050 | 0.510   | 0.184 | 0.022   | 0.122       | 0.191   | 0.293       | 0.002   |
| Leucine                      | -0.43 | 9.02E-11 | -0.66 | 2.85E-19 | -0.07 | 0.230   | -0.096 | 0.163   | 0.273 | 0.001   | 0.118       | 0.169   | 0.255       | 0.003   |
| Linoleic.acid                | -0.66 | 2.79E-13 | -0.96 | 1.20E-21 | -0.05 | 0.507   | 0.014  | 0.897   | 0.246 | 0.036   | 0.144       | 0.203   | 0.307       | 0.008   |
| Methionine                   | -0.36 | 1.18E-05 | -0.53 | 6.12E-10 | -0.03 | 0.719   | 0.021  | 0.821   | 0.242 | 0.017   | 0.211       | 0.059   | 0.260       | 0.020   |
| Palmitic.Acid                | -0.52 | 6.65E-13 | -0.77 | 5.84E-22 | -0.02 | 0.778   | 0.103  | 0.344   | 0.144 | 0.189   | 0.093       | 0.302   | 0.278       | 0.002   |
| Phenylalanine                | -0.24 | 6.59E-06 | -0.38 | 2.30E-11 | -0.02 | 0.651   | 0.014  | 0.887   | 0.160 | 0.124   | 0.074       | 0.308   | 0.177       | 0.016   |
| Serine                       | -0.20 | 2.45E-02 | -0.45 | 1.39E-06 | -0.01 | 0.891   | -0.035 | 0.682   | 0.105 | 0.220   | 0.092       | 0.459   | 0.282       | 0.024   |
| Stearic.acid                 | -0.39 | 2.24E-12 | -0.58 | 8.12E-21 | -0.04 | 0.428   | 0.038  | 0.635   | 0.095 | 0.242   | 0.100       | 0.157   | 0.198       | 0.006   |
| Valine                       | -0.20 | 3.34E-09 | -0.32 | 8.93E-18 | -0.05 | 0.151   | -0.047 | 0.326   | 0.177 | 0.001   | 0.042       | 0.351   | 0.115       | 0.011   |
| Oleic.acid                   | -1.00 | 6.87E-14 | -1.54 | 2.51E-24 | -0.04 | 0.718   | 0.043  | 0.790   | 0.166 | 0.307   | 0.257       | 0.123   | 0.632       | 0.000   |
| Tryptophan                   | -0.09 | 1.21E-01 | -0.13 | 3.75E-02 | 0.21  | 0.001   | -0.291 | 0.030   | 0.018 | 0.888   | -0.050      | 0.551   | -0.044      | 0.603   |
| Lactic.Acid                  | -0.09 | 8.90E-02 | -0.23 | 2.94E-05 | 0.16  | 0.004   | 0.023  | 0.748   | 0.156 | 0.039   | -0.124      | 0.105   | -0.161      | 0.036   |
| Pyruvic.acid                 | 0.17  | 4.51E-02 | 0.16  | 5.93E-02 | 0.31  | 0.000   | 0.058  | 0.638   | 0.010 | 0.937   | -0.216      | 0.065   | -0.302      | 0.011   |
| X2.Hydroxybutyric.acid       | -0.37 | 9.26E-06 | -0.77 | 2.82E-16 | -0.04 | 0.594   | 0.065  | 0.715   | 0.370 | 0.049   | 0.059       | 0.605   | 0.230       | 0.046   |
| X3.methyl.oxo.pentanoic.acid | -0.41 | 7.72E-07 | -0.72 | 3.31E-15 | -0.04 | 0.606   | -0.024 | 0.862   | 0.399 | 0.009   | 0.176       | 0.116   | 0.381       | 0.001   |
| Decanoic.acid                | -0.17 | 3.20E-02 | -0.29 | 2.83E-04 | -0.19 | 0.016   | 0.028  | 0.754   | 0.050 | 0.582   | 0.105       | 0.339   | 0.209       | 0.059   |
| Diethylene.glycol            | -0.06 | 1.67E-01 | -0.03 | 4.91E-01 | 0.13  | 0.003   | -0.024 | 0.727   | 0.008 | 0.905   | 0.011       | 0.862   | -0.027      | 0.657   |
| Dodecanoic.acid              | -0.72 | 4.34E-09 | -0.88 | 3.22E-12 | -0.03 | 0.788   | -0.065 | 0.669   | 0.172 | 0.263   | 0.325       | 0.043   | 0.333       | 0.038   |
| Ketoleucine                  | -0.37 | 3.96E-07 | -0.62 | 7.14E-15 | -0.03 | 0.717   | -0.018 | 0.887   | 0.406 | 0.004   | 0.093       | 0.343   | 0.274       | 0.006   |
| Myristic.acid                | -1.04 | 5.20E-14 | -1.52 | 4.56E-23 | -0.11 | 0.381   | 0.127  | 0.480   | 0.366 | 0.051   | 0.207       | 0.229   | 0.575       | 0.001   |
| Octanoic.acid                | -0.04 | 6.33E-01 | -0.08 | 2.84E-01 | -0.21 | 0.007   | 0.059  | 0.538   | 0.091 | 0.348   | 0.036       | 0.734   | 0.114       | 0.288   |

**ESM Table 2. Beta coefficients of metabolites and their P values from the mixed effect model with experiment, time and the relative interaction as within factor and glycaemic status as between factor**

| Metabolite                  | time2  | Pvalue   | time3  | Pvalue   | IGIVI  | Pvalue | IGT   | Pvalue | T2DM  | Pvalue | time2:IGIVI | Pvalue   | time3:IGIVI | Pvalue |
|-----------------------------|--------|----------|--------|----------|--------|--------|-------|--------|-------|--------|-------------|----------|-------------|--------|
| Heptadecanoic.acid.d33      | 537.63 | 3.38E-16 | 401.24 | 9.70E-11 | -99.0  | 0.08   | 95.7  | 0.39   | 106.3 | 0.34   | -377.7      | 5.81E-06 | -285.1      | 0.000  |
| Glutamic.acid.d5            | 548.56 | 9.87E-16 | 413.37 | 1.47E-10 | -100.2 | 0.09   | 97.0  | 0.40   | 106.6 | 0.35   | -383.8      | 9.48E-06 | -294.5      | 0.001  |
| Succinic.d4.acid            | 556.13 | 3.92E-16 | 414.58 | 1.12E-10 | -102.2 | 0.08   | 97.9  | 0.39   | 108.3 | 0.35   | -390.0      | 6.36E-06 | -293.3      | 0.001  |
| Valine.d8                   | 579.35 | 9.64E-16 | 436.60 | 1.44E-10 | -105.7 | 0.09   | 102.5 | 0.40   | 111.3 | 0.36   | -407.1      | 8.66E-06 | -310.5      | 0.001  |
| C11                         | 669.62 | 2.45E-16 | 495.30 | 1.06E-10 | -122.9 | 0.08   | 118.3 | 0.39   | 131.1 | 0.34   | -471.7      | 4.87E-06 | -351.0      | 0.001  |
| C15                         | 657.68 | 3.58E-16 | 491.86 | 9.37E-11 | -122.0 | 0.08   | 117.6 | 0.38   | 130.2 | 0.34   | -462.0      | 5.96E-06 | -349.0      | 0.000  |
| C17                         | 661.61 | 2.81E-16 | 493.04 | 8.97E-11 | -122.1 | 0.08   | 118.7 | 0.38   | 130.8 | 0.34   | -464.8      | 5.42E-06 | -349.7      | 0.000  |
| C21                         | 657.53 | 3.19E-16 | 491.15 | 9.01E-11 | -121.5 | 0.08   | 117.0 | 0.39   | 129.6 | 0.34   | -462.1      | 5.65E-06 | -348.8      | 0.000  |
| C25                         | 653.85 | 3.77E-16 | 489.40 | 9.44E-11 | -121.6 | 0.08   | 114.9 | 0.39   | 127.8 | 0.34   | -459.5      | 6.04E-06 | -347.5      | 0.000  |
| X3.Hydroxybutyric.acid      | 169.05 | 1.13E-13 | 94.04  | 7.01E-06 | -52.0  | 0.01   | 38.2  | 0.39   | 60.5  | 0.18   | -129.5      | 1.16E-05 | -76.9       | 0.007  |
| Alanine                     | 222.56 | 2.90E-16 | 163.95 | 1.38E-10 | -36.1  | 0.12   | 47.6  | 0.29   | 50.1  | 0.27   | -157.5      | 4.72E-06 | -119.6      | 0.000  |
| Arachidonic.acid            | 265.71 | 3.25E-16 | 196.40 | 1.33E-10 | -51.4  | 0.07   | 53.1  | 0.33   | 59.3  | 0.28   | -187.5      | 5.27E-06 | -141.7      | 0.000  |
| Citric.acid                 | 230.11 | 7.25E-16 | 163.36 | 8.94E-10 | -45.7  | 0.06   | 45.9  | 0.34   | 58.7  | 0.23   | -164.4      | 5.63E-06 | -118.7      | 0.001  |
| Glutamic.acid               | 185.48 | 6.39E-16 | 130.77 | 1.03E-09 | -33.5  | 0.09   | 23.8  | 0.56   | 41.6  | 0.32   | -133.3      | 4.75E-06 | -95.7       | 0.001  |
| Glycine                     | 177.48 | 8.46E-16 | 134.07 | 1.20E-10 | -32.4  | 0.09   | 30.8  | 0.41   | 31.6  | 0.40   | -123.4      | 1.01E-05 | -93.7       | 0.001  |
| Isoleucine                  | 173.32 | 1.18E-14 | 114.61 | 4.15E-08 | -37.3  | 0.06   | 32.7  | 0.40   | 43.4  | 0.27   | -124.8      | 1.45E-05 | -83.4       | 0.003  |
| Leucine                     | 201.11 | 9.19E-15 | 137.27 | 1.48E-08 | -42.8  | 0.06   | 35.6  | 0.43   | 50.9  | 0.26   | -144.5      | 1.36E-05 | -100.0      | 0.002  |
| Linoleic.acid               | 296.00 | 1.38E-15 | 204.00 | 3.44E-09 | -62.0  | 0.05   | 59.1  | 0.37   | 70.1  | 0.29   | -212.8      | 6.40E-06 | -150.2      | 0.001  |
| Malic.acid                  | 144.16 | 1.11E-15 | 101.11 | 1.75E-09 | -27.6  | 0.08   | 32.3  | 0.30   | 46.3  | 0.14   | -107.3      | 2.96E-06 | -79.0       | 0.000  |
| Methionine                  | 155.52 | 4.90E-15 | 104.91 | 1.42E-08 | -33.4  | 0.05   | 32.4  | 0.34   | 41.8  | 0.22   | -107.4      | 2.19E-05 | -74.4       | 0.003  |
| Palmitic.Acic               | 325.24 | 5.54E-16 | 228.00 | 1.13E-09 | -65.8  | 0.06   | 64.7  | 0.36   | 71.2  | 0.31   | -232.3      | 5.12E-06 | -164.3      | 0.001  |
| Phenylalanine               | 182.08 | 7.35E-16 | 127.07 | 1.56E-09 | -36.7  | 0.06   | 34.4  | 0.38   | 42.5  | 0.28   | -128.8      | 6.90E-06 | -90.4       | 0.001  |
| Proline                     | 218.16 | 6.14E-15 | 157.12 | 2.30E-09 | -41.5  | 0.09   | 40.8  | 0.39   | 42.1  | 0.38   | -154.7      | 1.49E-05 | -113.8      | 0.001  |
| Serine                      | 190.52 | 3.59E-15 | 131.75 | 5.66E-09 | -36.8  | 0.08   | 35.8  | 0.39   | 35.2  | 0.40   | -134.4      | 1.34E-05 | -92.9       | 0.002  |
| Stearic.acid                | 297.80 | 7.96E-16 | 211.31 | 9.66E-10 | -60.3  | 0.06   | 56.3  | 0.38   | 62.2  | 0.33   | -211.4      | 6.61E-06 | -152.0      | 0.001  |
| Threonine                   | 200.45 | 8.73E-16 | 142.11 | 1.06E-09 | -39.8  | 0.06   | 42.3  | 0.31   | 40.5  | 0.33   | -141.6      | 7.54E-06 | -101.9      | 0.001  |
| Tyrosine                    | 358.79 | 1.00E-15 | 257.56 | 7.69E-10 | -64.6  | 0.09   | 61.9  | 0.41   | 80.3  | 0.29   | -254.7      | 7.23E-06 | -183.4      | 0.001  |
| Valine                      | 216.08 | 6.75E-16 | 154.29 | 7.06E-10 | -42.7  | 0.06   | 38.4  | 0.40   | 49.6  | 0.28   | -153.8      | 5.90E-06 | -111.0      | 0.001  |
| alpha.Tocopherol            | 472.05 | 4.12E-16 | 351.42 | 1.22E-10 | -86.1  | 0.08   | 90.5  | 0.35   | 104.5 | 0.28   | -332.3      | 6.02E-06 | -249.5      | 0.001  |
| Oleic.acid                  | 396.33 | 9.91E-16 | 265.09 | 6.96E-09 | -84.0  | 0.05   | 80.2  | 0.37   | 89.6  | 0.31   | -284.0      | 6.03E-06 | -191.6      | 0.002  |
| Succinic.acid               | 450.75 | 3.17E-16 | 332.95 | 1.34E-10 | -83.6  | 0.08   | 74.6  | 0.42   | 97.3  | 0.30   | -318.7      | 5.02E-06 | -236.1      | 0.001  |
| Fumaric.acid                | 465.46 | 9.76E-16 | 349.36 | 1.67E-10 | -85.9  | 0.09   | 80.7  | 0.41   | 95.8  | 0.33   | -327.2      | 8.67E-06 | -246.4      | 0.001  |
| X3.4.Dihydroxybutanoic.acid | 378.75 | 8.15E-16 | 279.27 | 2.73E-10 | -73.1  | 0.07   | 66.9  | 0.40   | 81.0  | 0.31   | -268.6      | 6.84E-06 | -201.9      | 0.001  |
| Aspartic.acid               | 444.63 | 2.32E-15 | 334.41 | 2.87E-10 | -80.9  | 0.10   | 74.6  | 0.43   | 88.2  | 0.36   | -313.7      | 1.12E-05 | -241.2      | 0.001  |
| X2.4.Dihydroxybutyric.acid  | 375.95 | 9.85E-16 | 272.99 | 5.21E-10 | -73.1  | 0.07   | 67.9  | 0.39   | 86.1  | 0.28   | -266.6      | 7.34E-06 | -198.0      | 0.001  |
| Tryptophan                  | 502.46 | 3.00E-16 | 373.45 | 1.03E-10 | -88.2  | 0.09   | 81.7  | 0.43   | 100.4 | 0.34   | -354.6      | 5.09E-06 | -266.8      | 0.000  |
| Lactic.Acic                 | 641.88 | 2.97E-16 | 471.43 | 1.56E-10 | -116.2 | 0.08   | 117.1 | 0.38   | 131.4 | 0.32   | -454.5      | 4.73E-06 | -340.2      | 0.000  |
| Glyceric.acid               | 482.62 | 3.92E-16 | 351.65 | 2.48E-10 | -91.4  | 0.07   | 88.6  | 0.38   | 104.0 | 0.30   | -342.4      | 5.09E-06 | -253.0      | 0.001  |

|                              |        |          |        |          |        |      |       |      |       |      |        |          |        |       |
|------------------------------|--------|----------|--------|----------|--------|------|-------|------|-------|------|--------|----------|--------|-------|
| Pyruvic.acid                 | 578.81 | 2.09E-16 | 431.47 | 7.21E-11 | -98.5  | 0.10 | 105.8 | 0.37 | 111.4 | 0.35 | -408.6 | 4.38E-06 | -310.0 | 0.000 |
| X2.Hydroxybutyric.acid       | 576.79 | 3.91E-16 | 409.96 | 5.74E-10 | -109.9 | 0.07 | 107.9 | 0.37 | 127.5 | 0.29 | -408.6 | 5.23E-06 | -294.6 | 0.001 |
| Cholesterol                  | 657.92 | 3.57E-16 | 493.01 | 8.71E-11 | -120.1 | 0.08 | 119.9 | 0.38 | 131.3 | 0.33 | -462.6 | 5.84E-06 | -350.1 | 0.000 |
| X1.Dodecanol                 | 514.72 | 2.70E-16 | 379.88 | 1.23E-10 | -93.1  | 0.08 | 92.4  | 0.38 | 106.2 | 0.32 | -363.4 | 4.83E-06 | -271.4 | 0.000 |
| X2.Aminobutyric.acid         | 571.28 | 9.50E-16 | 417.99 | 3.94E-10 | -103.8 | 0.09 | 101.0 | 0.40 | 113.0 | 0.34 | -403.5 | 7.83E-06 | -298.2 | 0.001 |
| X2.Oxoisovaleric.acid        | 583.34 | 5.07E-16 | 428.60 | 2.22E-10 | -107.7 | 0.08 | 104.9 | 0.39 | 122.2 | 0.32 | -412.0 | 6.13E-06 | -305.1 | 0.001 |
| X2.Palmitoylglycerol         | 518.17 | 3.37E-16 | 383.44 | 1.31E-10 | -97.5  | 0.07 | 96.6  | 0.36 | 101.7 | 0.34 | -366.5 | 5.10E-06 | -272.2 | 0.001 |
| X3.Hydroxyisovaleric.acid    | 527.72 | 6.34E-16 | 389.60 | 2.20E-10 | -100.1 | 0.08 | 98.8  | 0.37 | 109.1 | 0.33 | -379.9 | 4.59E-06 | -271.7 | 0.001 |
| X3.Indoleacetic.acid         | 511.34 | 8.13E-16 | 380.16 | 2.05E-10 | -98.2  | 0.07 | 69.6  | 0.51 | 121.0 | 0.25 | -360.6 | 7.59E-06 | -269.4 | 0.001 |
| X3.methyl.oxo.pentanoic.acid | 591.57 | 6.83E-16 | 424.58 | 6.01E-10 | -114.0 | 0.07 | 108.8 | 0.38 | 133.2 | 0.29 | -416.4 | 7.35E-06 | -301.1 | 0.001 |
| X4.Deoxytetronic.acid_1      | 513.73 | 1.29E-15 | 380.11 | 3.33E-10 | -93.8  | 0.09 | 96.1  | 0.38 | 100.6 | 0.36 | -363.2 | 8.64E-06 | -273.1 | 0.001 |
| X4.Hydroxybutanoic.acid      | 486.73 | 3.19E-16 | 359.52 | 1.34E-10 | -94.4  | 0.07 | 88.2  | 0.38 | 99.6  | 0.32 | -345.1 | 4.74E-06 | -255.4 | 0.001 |
| X4.Hydroxyphenyllactic.acid  | 515.56 | 4.77E-16 | 378.53 | 2.19E-10 | -96.3  | 0.08 | 92.5  | 0.38 | 102.4 | 0.34 | -365.2 | 5.67E-06 | -272.5 | 0.001 |
| X9.Hexadecenoic.acid_1       | 550.01 | 1.35E-15 | 379.30 | 3.34E-09 | -103.4 | 0.08 | 111.0 | 0.36 | 104.1 | 0.39 | -396.2 | 6.15E-06 | -279.0 | 0.001 |
| Aminomalonic.acid            | 617.83 | 3.53E-16 | 458.99 | 1.17E-10 | -114.3 | 0.08 | 109.8 | 0.39 | 118.2 | 0.35 | -435.8 | 5.47E-06 | -327.1 | 0.001 |
| Asparagine                   | 542.49 | 5.48E-16 | 395.26 | 3.12E-10 | -98.0  | 0.09 | 100.0 | 0.38 | 110.5 | 0.33 | -382.2 | 6.64E-06 | -280.5 | 0.001 |
| Creatinine                   | 615.33 | 4.22E-16 | 461.59 | 9.43E-11 | -114.1 | 0.08 | 102.3 | 0.42 | 115.6 | 0.36 | -434.5 | 5.72E-06 | -328.0 | 0.000 |
| Decanoic.acid                | 553.49 | 2.81E-16 | 405.50 | 1.64E-10 | -109.6 | 0.06 | 101.9 | 0.38 | 104.8 | 0.36 | -389.0 | 5.37E-06 | -285.9 | 0.001 |
| Diethylene.glycol            | 562.16 | 3.76E-16 | 421.28 | 9.02E-11 | -101.4 | 0.09 | 101.5 | 0.39 | 112.7 | 0.34 | -394.6 | 6.17E-06 | -299.8 | 0.000 |
| Docosahexaenoic.acid         | 565.71 | 6.16E-16 | 417.19 | 2.24E-10 | -108.8 | 0.07 | 110.8 | 0.35 | 118.5 | 0.31 | -396.9 | 7.51E-06 | -298.1 | 0.001 |
| Dodecanoic.acid              | 531.38 | 1.44E-15 | 384.60 | 7.47E-10 | -106.4 | 0.06 | 98.8  | 0.39 | 114.8 | 0.32 | -373.6 | 9.99E-06 | -276.7 | 0.001 |
| Glycerol_1                   | 729.82 | 6.04E-17 | 539.85 | 3.99E-11 | -134.9 | 0.07 | 131.6 | 0.38 | 147.7 | 0.32 | -506.1 | 3.88E-06 | -372.8 | 0.001 |
| Glycerol.3.phosphate         | 602.25 | 3.75E-16 | 441.33 | 1.98E-10 | -114.1 | 0.07 | 114.8 | 0.35 | 118.0 | 0.34 | -424.5 | 5.67E-06 | -315.6 | 0.001 |
| Ketoleucine                  | 599.47 | 7.52E-16 | 433.96 | 4.81E-10 | -114.5 | 0.07 | 110.6 | 0.38 | 133.6 | 0.29 | -423.5 | 7.10E-06 | -308.9 | 0.001 |
| Myo.Inositol                 | 673.23 | 2.22E-16 | 504.69 | 6.13E-11 | -123.1 | 0.08 | 120.7 | 0.38 | 134.8 | 0.33 | -476.0 | 4.35E-06 | -359.6 | 0.000 |
| Myristic.acid                | 554.93 | 8.66E-16 | 384.42 | 2.20E-09 | -115.7 | 0.05 | 110.0 | 0.36 | 125.9 | 0.30 | -397.8 | 5.67E-06 | -277.5 | 0.001 |
| Octanoic.acid                | 596.91 | 2.44E-16 | 442.74 | 9.60E-11 | -116.3 | 0.06 | 109.3 | 0.37 | 111.8 | 0.36 | -419.9 | 5.00E-06 | -312.4 | 0.001 |
| Pentadecanoic.acid_1         | 504.75 | 1.50E-15 | 357.72 | 1.52E-09 | -103.5 | 0.06 | 101.7 | 0.35 | 96.3  | 0.38 | -363.7 | 6.36E-06 | -259.4 | 0.001 |
| Pyroglutamic.acid_1          | 557.12 | 8.08E-16 | 410.22 | 2.84E-10 | -106.3 | 0.07 | 105.9 | 0.37 | 113.4 | 0.34 | -393.0 | 7.53E-06 | -291.5 | 0.001 |
| Ribonic.acid_1               | 520.38 | 2.82E-16 | 382.43 | 1.47E-10 | -98.1  | 0.07 | 98.3  | 0.34 | 106.0 | 0.30 | -369.1 | 4.49E-06 | -273.2 | 0.001 |
| Terephthalic.acid            | 445.49 | 5.38E-16 | 334.86 | 1.04E-10 | -82.8  | 0.08 | 83.0  | 0.37 | 92.1  | 0.33 | -313.3 | 6.81E-06 | -235.7 | 0.001 |
| Triethylene.glycol           | 623.01 | 3.40E-16 | 465.23 | 9.54E-11 | -115.5 | 0.08 | 109.8 | 0.39 | 123.4 | 0.34 | -438.0 | 5.76E-06 | -329.7 | 0.000 |
| Uridine                      | 535.78 | 3.56E-16 | 395.29 | 1.51E-10 | -99.3  | 0.08 | 95.2  | 0.39 | 109.7 | 0.33 | -376.3 | 5.97E-06 | -278.1 | 0.001 |

**ESM Table 3. Beta coefficients of metabolites with their P values from the mixed effect model multiplied by insulin with experiment, time and the relative interaction as within factor and glycaemic status as between factor**

■ Oral ■ IGIVI

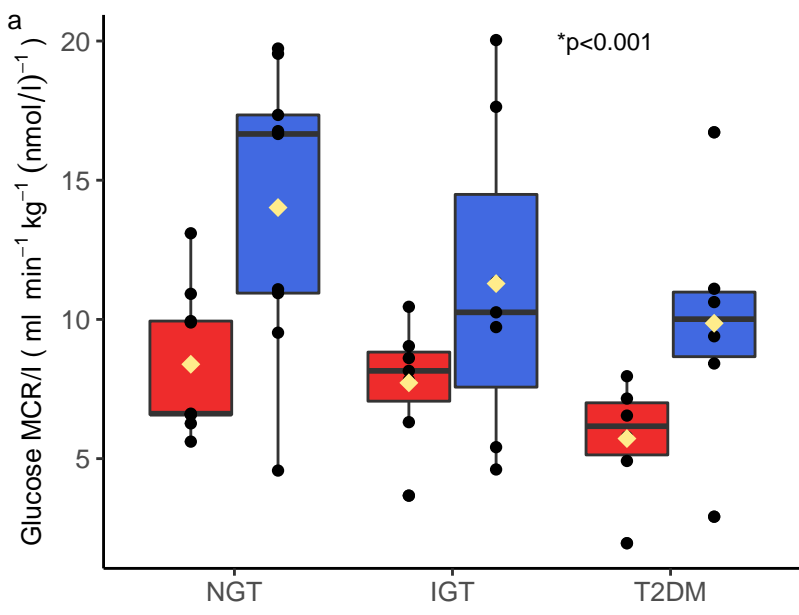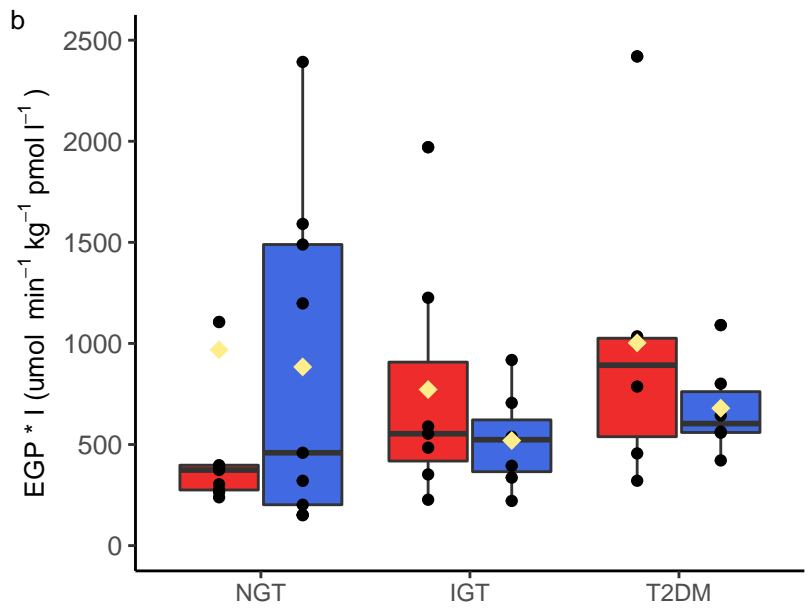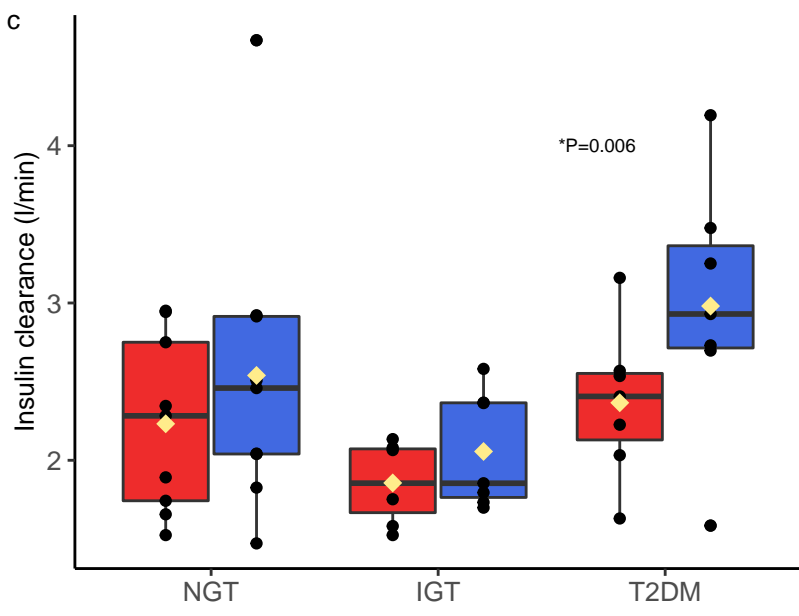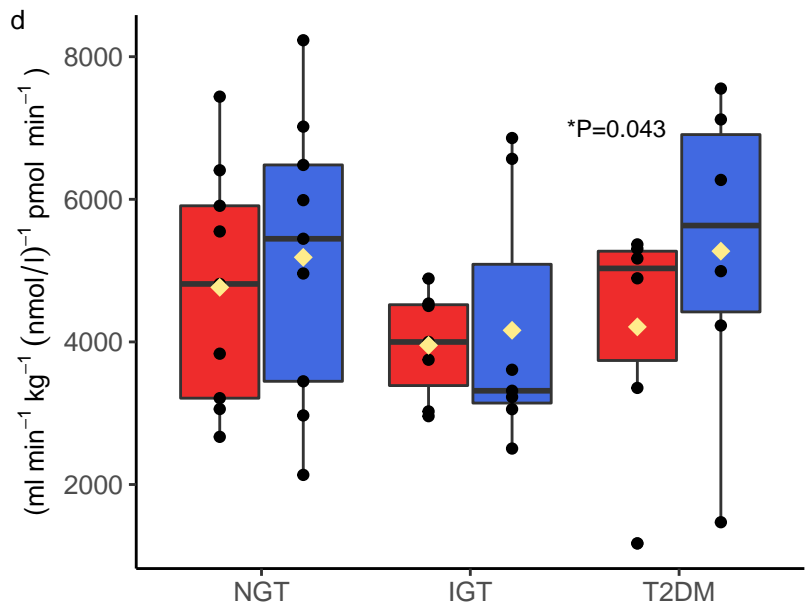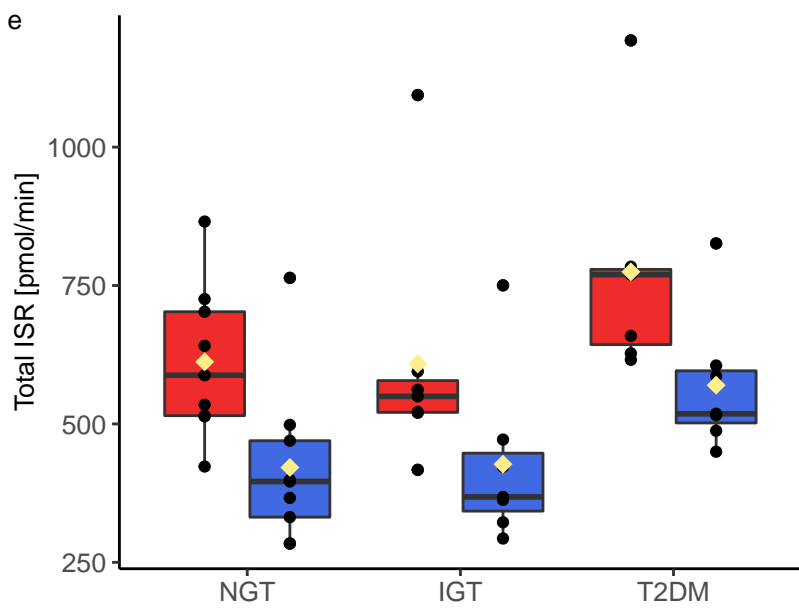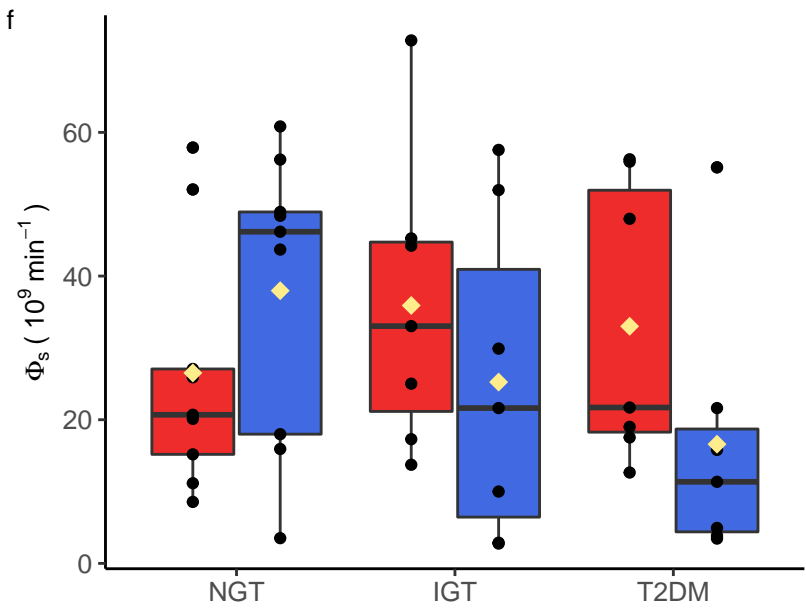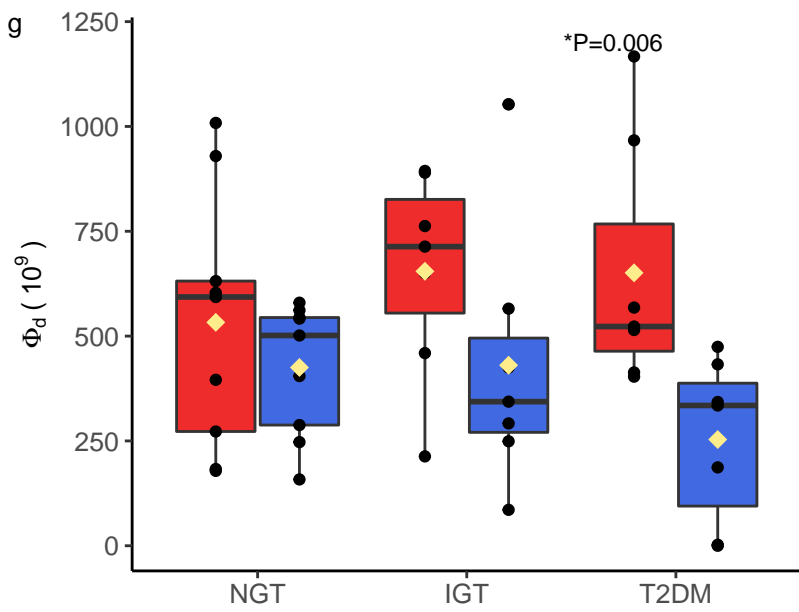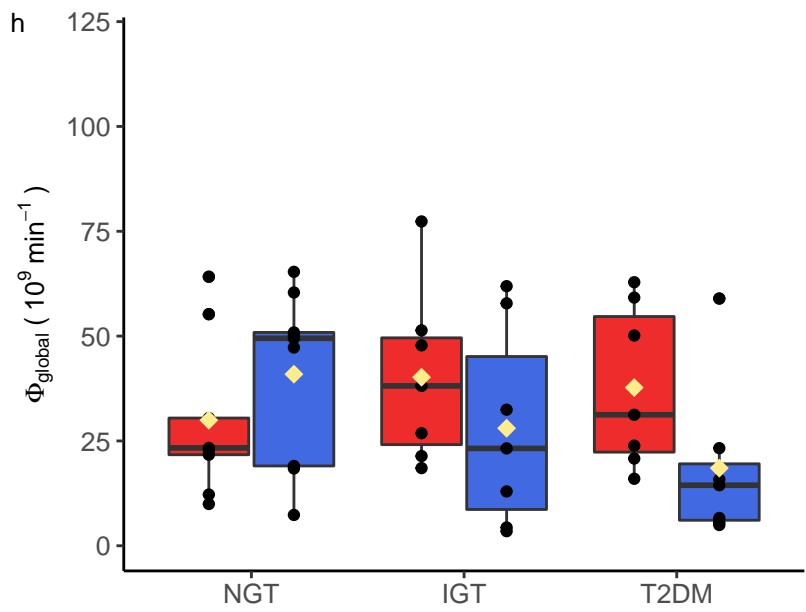

### ESM Figure 1

Whole-body insulin sensitivity measured with stable isotopes as insulin-mediated glucose metabolic clearance rate (MCR), i.e. Rate of glucose disappearance (Rd) from general circulation normalized by circulating levels of glucose and insulin (Rd/G)/I in relation to the glycaemic states (NGT, IGT and T2DM) and route of glucose administration (Oral vs IGIVI) (panel a). EGP measured by stable isotopes and multiplied by circulating levels of insulin was used as an index of hepatic insulin resistance (panel b). Insulin clearance computed according to the formula  $ISR-AUC/insulin-AUC - V \times (Insulin \text{ at final time} - Insulin \text{ at initial time}) / insulin-AUC$  (panel c). Disposition Index (DI) was computed as the product of insulin-mediated MCR (panel d) and the total insulin secretion rate (ISR) (panel e), computed as the area under the curve of ISR. Panel e reports the average insulin secretion resulting from the total ISR AUC. Static ( $\Phi_s$ ) (panel f) and dynamic ( $\Phi_d$ ) (panel g)  $\beta$ -cell glucose sensitivity and global  $\beta$ -cell glucose sensitivity ( $\Phi_{global}$ ) (panel h), which results from the sum of the two components above.

Black circles represent single subject values whereas yellow diamonds represent mean values.

\* P level refers to the comparison between Oral administration and IGIVI
